# Supplementary material for: Genetic risk factors for autoimmune hepatitis: implications for phenotypic heterogeneity and biomarkers for drug response
Source: PubMed Central journal article supplement (PMC7841991; doi:10.1186/s40246-020-00301-4), 2021-01-28
Supplement: 40246_2020_301_MOESM1_ESM.pdf [file 40246_2020_301_MOESM1_ESM.pdf]

Supplementary Table S1. Logistic regression analysis of *DPB1* alleles in AIH patients and controls.

| <i>DPB1</i> allele | Unconditioned |              |          |                      | Conditioned on <i>DRB1</i> alleles |               |                             |                               |
|--------------------|---------------|--------------|----------|----------------------|------------------------------------|---------------|-----------------------------|-------------------------------|
|                    | OR            | 95%CI        | <i>P</i> | <i>P<sub>c</sub></i> | OR <sub>adjusted</sub>             | 95%CI         | <i>P<sub>adjusted</sub></i> | <i>P<sub>c adjusted</sub></i> |
| <i>DPB1*02:01</i>  | 0.77          | (0.61–0.98)  | 0.0349   | 0.4884               | 0.78                               | (0.59–1.03)   | 0.0804                      | NS                            |
| <i>DPB1*02:02</i>  | 0.75          | (0.44–1.27)  | 0.2848   | NS                   | 0.69                               | (0.38–1.27)   | 0.2353                      | NS                            |
| <i>DPB1*03:01</i>  | 1.19          | (0.74–1.92)  | 0.4663   | NS                   | 1.12                               | (0.65–1.92)   | 0.6917                      | NS                            |
| <i>DPB1*04:01</i>  | 0.78          | (0.49–1.24)  | 0.3028   | NS                   | 1.64                               | (0.77–3.52)   | 0.2026                      | NS                            |
| <i>DPB1*04:02</i>  | 1.07          | (0.75–1.51)  | 0.7132   | NS                   | 0.98                               | (0.62–1.54)   | 0.9209                      | NS                            |
| <i>DPB1*05:01</i>  | 1.27          | (1.04–1.56)  | 0.0192   | 0.2694               | 1.08                               | (0.85–1.38)   | 0.5168                      | NS                            |
| <i>DPB1*06:01</i>  | 1.54          | (0.34–6.91)  | 0.5761   | NS                   | 2.25                               | (0.43–11.78)  | 0.3360                      | NS                            |
| <i>DPB1*09:01</i>  | 0.86          | (0.61–1.20)  | 0.3716   | NS                   | 1.47                               | (0.77–2.82)   | 0.2472                      | NS                            |
| <i>DPB1*13:01</i>  | 0.47          | (0.20–1.09)  | 0.0787   | NS                   | 0.58                               | (0.24–1.43)   | 0.2402                      | NS                            |
| <i>DPB1*14:01</i>  | 2.35          | (1.00–5.57)  | 0.0512   | 0.7165               | 1.49                               | (0.54–4.09)   | 0.4372                      | NS                            |
| <i>DPB1*17:01</i>  | 0.76          | (0.13–4.59)  | 0.7682   | NS                   | 1.83                               | (0.10–35.37)  | 0.6882                      | NS                            |
| <i>DPB1*19:01</i>  | 2.89          | (0.56–15.01) | 0.2057   | NS                   | 2.54                               | (0.42–15.45)  | 0.3116                      | NS                            |
| <i>DPB1*25:01</i>  | 1.15          | (0.07–18.41) | 0.9225   | NS                   | 3.67                               | (0.13–103.05) | 0.4449                      | NS                            |
| <i>DPB1*41:01</i>  | 0.57          | (0.05–6.34)  | 0.6493   | NS                   | 0.89                               | (0.06–14.16)  | 0.9315                      | NS                            |
| DP2                | 0.78          | (0.63–0.95)  | 0.0128   |                      | 0.82                               | (0.64–1.04)   | 0.1000                      |                               |
| DP5                | 1.29          | (1.05–1.57)  | 0.0132   |                      | 1.22                               | (0.96–1.55)   | 0.1091                      |                               |

AIH: autoimmune hepatitis, OR: odds ratio, CI: confidence interval, *P<sub>c</sub>*: corrected *P* value, NS: not significant. Association was tested by logistic regression analysis. Association was tested by logistic regression analysis. *P<sub>adjusted</sub>* and OR<sub>adjusted</sub> were calculated by conditional logistic regression analysis under the additive model. Corrected *P* (*P<sub>c</sub>*) values were calculated by multiplying the *P* value by the number of alleles tested. Allele group DP5 includes *DPB1\*03:01*, *\*05:01*, *\*06:01*, *\*09:01*, *\*13:01*, *\*14:01*, *\*19:01*, and *\*25:01* and allele group DP2 includes *DPB1\*02:01*, *\*02:02*, *\*04:01*, *\*04:02*, *\*17:01*, and *\*41:01*.
