# Supplementary material for: Genetic risk factors for autoimmune hepatitis: implications for phenotypic heterogeneity and biomarkers for drug response
Source: PubMed Central journal article supplement (PMC7841991; doi:10.1186/s40246-020-00301-4), 2021-01-28
Supplement: 40246_2020_301_MOESM2_ESM.pdf [file 40246_2020_301_MOESM2_ESM.pdf]

Supplementary Table 2. Logistic regression analysis of *DPB1* alleles in AIH patients with cirrhosis and controls.

| <i>DPB1</i> allele | Unconditioned |              |          |                      | Conditioned on <i>DRB1</i> alleles |              |                             |                               |
|--------------------|---------------|--------------|----------|----------------------|------------------------------------|--------------|-----------------------------|-------------------------------|
|                    | OR            | 95%CI        | <i>P</i> | <i>P<sub>c</sub></i> | OR <sub>adjusted</sub>             | 95%CI        | <i>P<sub>adjusted</sub></i> | <i>P<sub>c adjusted</sub></i> |
| <i>DPB1*02:01</i>  | 0.81          | (0.46–1.40)  | 0.4454   | NS                   | 1.03                               | (0.56–1.91)  | 0.9176                      | NS                            |
| <i>DPB1*02:02</i>  | 0.86          | (0.26–2.86)  | 0.8111   | NS                   | 1.19                               | (0.30–4.74)  | 0.8076                      | NS                            |
| <i>DPB1*03:01</i>  | 1.69          | (0.69–4.14)  | 0.2526   | NS                   | 1.49                               | (0.54–4.11)  | 0.4455                      | NS                            |
| <i>DPB1*04:01</i>  | 2.04          | (0.98–4.24)  | 0.0574   | 0.5165               | 5.60                               | (1.13–27.63) | 0.0346                      | 0.2768                        |
| <i>DPB1*04:02</i>  | 1.46          | (0.73–2.90)  | 0.2843   | NS                   | 1.50                               | (0.65–3.46)  | 0.3404                      | NS                            |
| <i>DPB1*05:01</i>  | 0.89          | (0.57–1.40)  | 0.6135   | NS                   | 0.70                               | (0.41–1.21)  | 0.2018                      | NS                            |
| <i>DPB1*06:01</i>  | 3.33          | (0.34–32.78) | 0.3019   | NS                   | 5.27                               | (0.32–85.68) | 0.2432                      | NS                            |
| <i>DPB1*09:01</i>  | 0.77          | (0.35–1.73)  | 0.5299   | NS                   | 1.09                               | (0.25–4.72)  | 0.9096                      | NS                            |
| <i>DPB1*14:01</i>  | 1.23          | (0.15–10.12) | 0.8442   | NS                   | NA                                 | NA           | NA                          | NA                            |
| DP2                | 1.17          | (0.75–1.81)  | 0.4877   |                      | 1.57                               | (0.90–2.73)  | 0.1091                      |                               |
| DP5                | 0.86          | (0.55–1.33)  | 0.5001   |                      | 0.64                               | (0.37–1.11)  | 0.1141                      |                               |

AIH: autoimmune hepatitis, OR: odds ratio, CI: confidence interval, *P<sub>c</sub>*: corrected *P* value, NS: not significant, NA not applicable. Association was tested by logistic regression analysis. *P<sub>adjusted</sub>* and OR<sub>adjusted</sub> were calculated by conditional logistic regression analysis under the additive model. Corrected *P* (*P<sub>c</sub>*) values were calculated by multiplying the *P* value by the number of alleles tested. Allele group DP5 includes *DPB1\*03:01*, *\*05:01*, *\*06:01*, *\*09:01*, *\*13:01*, *\*14:01*, *\*19:01*, and *\*25:01* and allele group DP2 includes *DPB1\*02:01*, *\*02:02*, *\*04:01*, *\*04:02*, *\*17:01*, and *\*41:01*.
